# Supplementary material for: A novel peptide-based fluorescent chemosensor for measuring zinc ions using different excitation wavelengths and application in live cell imaging
Source: Royal Society of Chemistry journal article supplement (doi:10.1039/c5tb00142k), 2015-01-01
Supplement: c5tb00142k1.pdf [file c5tb00142k1.pdf]

Electronic Supplementary Material (ESI) for Journal of Materials Chemistry B.

This journal is © The Royal Society of Chemistry 2015

## Supporting Information

### **A Novel Peptide-based Fluorescent Chemosensor for Measuring Zinc Ion by Different Excitation Wavelengths and Application in Living Cell Image**

Peng Wang, Jiang Wu\*, Panpan Zhou, Weisheng Liu and Yu Tang\*

Key Laboratory of Nonferrous Metal Chemistry and Resources Utilization of Gansu Province and State Key Laboratory of Applied Organic Chemistry, College of Chemistry and Chemical Engineering, Lanzhou University, Lanzhou 730000, People's Republic of China

\*Corresponding Author. Tel: 86-931-8912552 Fax: 86-931-8912582. E-mail address: tangyu@lzu.edu.cn

\*Corresponding Author. E-mail address: wujiang@lzu.edu.cn

**HPLC Chromatogram of L**

Sample: L

Column: 4.6\*150mm, kromasil C18-5

Solvent A: 0.1%Trifluoroacetic acid in 100%Acetonitrile

Solvent B: 0.1%Trifluoroacetic acid in 100% Water

|           |         |     |     |
|-----------|---------|-----|-----|
| Gradient: | Time    | A   | B   |
|           | 0.01min | 5%  | 95% |
|           | 25.0min | 70% | 30% |

Flow rate: 1.0 mL min<sup>-1</sup>

Wavelength: 214 nm

Volume: 10  $\mu$ L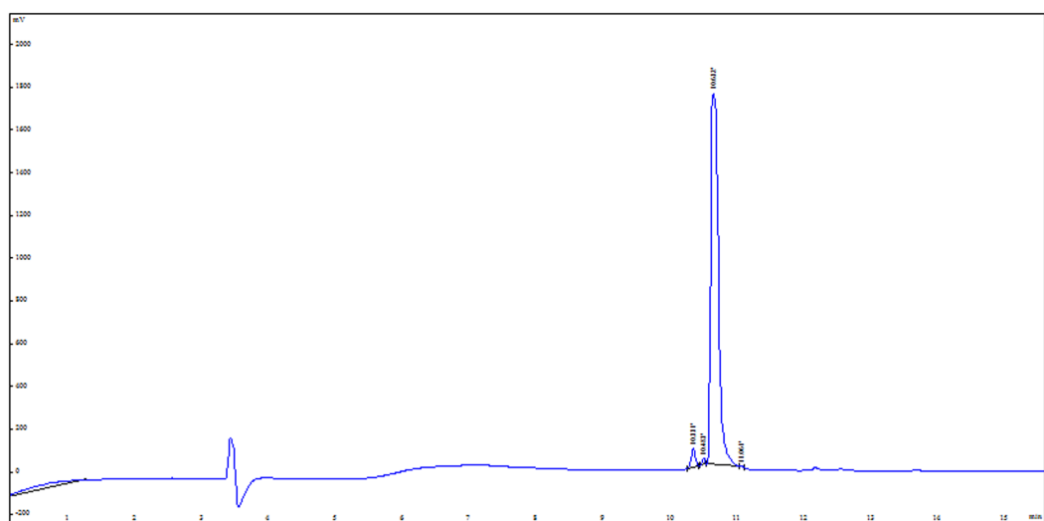**Fig. S1** HPLC Chromatogram of L**Table S1.** HPLC Chromatogram data of L

| Rank  | Time   | Name Conc. | Area    |
|-------|--------|------------|---------|
| 1     | 10.245 | 0.1522     | 6838    |
| 2     | 10.441 | 96.13      | 4319578 |
| 3     | 12.500 | 3.725      | 167377  |
| Total |        | 100        | 4493793 |

**MS Analysis data**

Sample: L

Expected MS: 922.3043

Buffer: 0.1% TFA in second distilled water

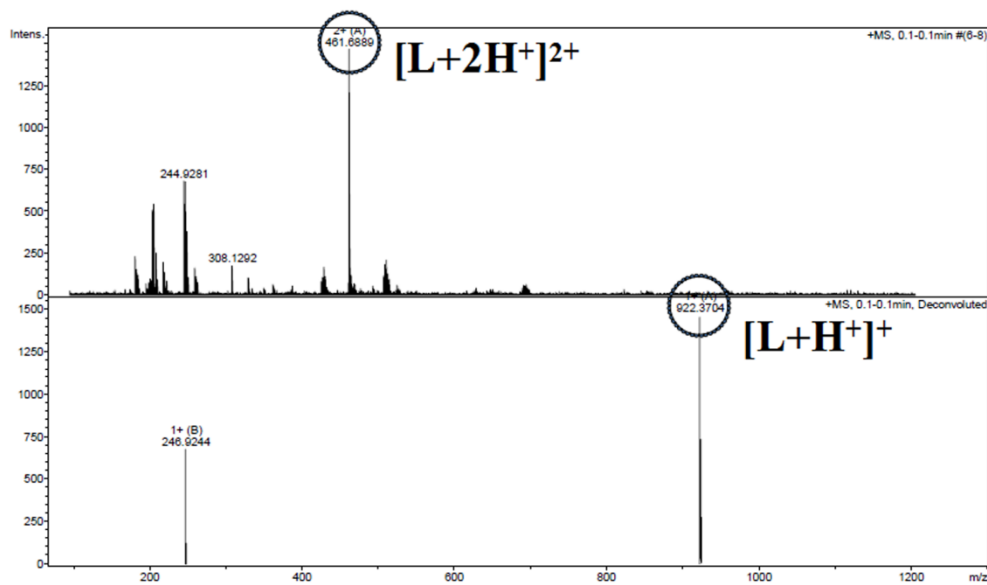**Fig. S2** MS (ESI) Spectrum of L.**The metal ions selectivity of L**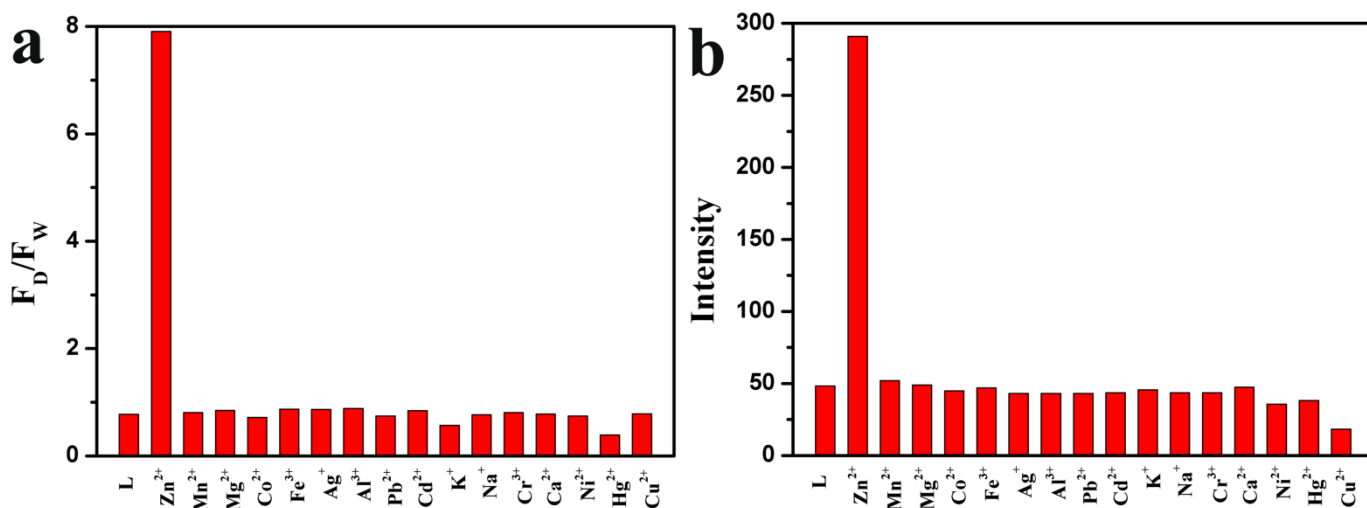**Fig. S3** The metal ion selectivity of L in 10 mM HEPES buffer solution at pH 7.4. The molar ratio of metal:L is 1:2. (a) Excitation wavelength: 290 nm, (b) Excitation wavelength: 330 nm. In the inset of (a),  $F_D$  and  $F_W$  are the fluorescence emission intensity of dansyl and Tryptophan motifs.

## Fluorescence interference test of $\text{Cd}^{2+}$

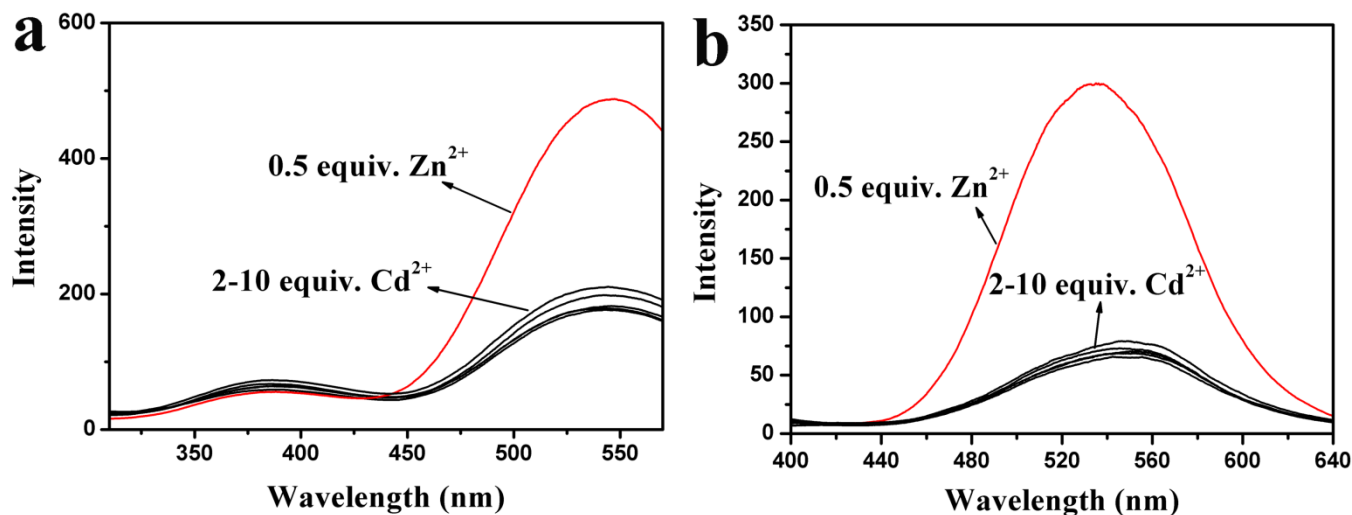

**Fig. S4** Fluorescence emission spectra of **L** (10  $\mu\text{M}$ ) upon addition of  $\text{Cd}^{2+}$  (2, 4, 6, 8, 10 equiv) in 10 mM HEPES buffer solution at pH 7.4. (a) Excitation wavelength: 290 nm, (b) Excitation wavelength: 330 nm.

## Counter anions test of $\text{Zn}^{2+}$

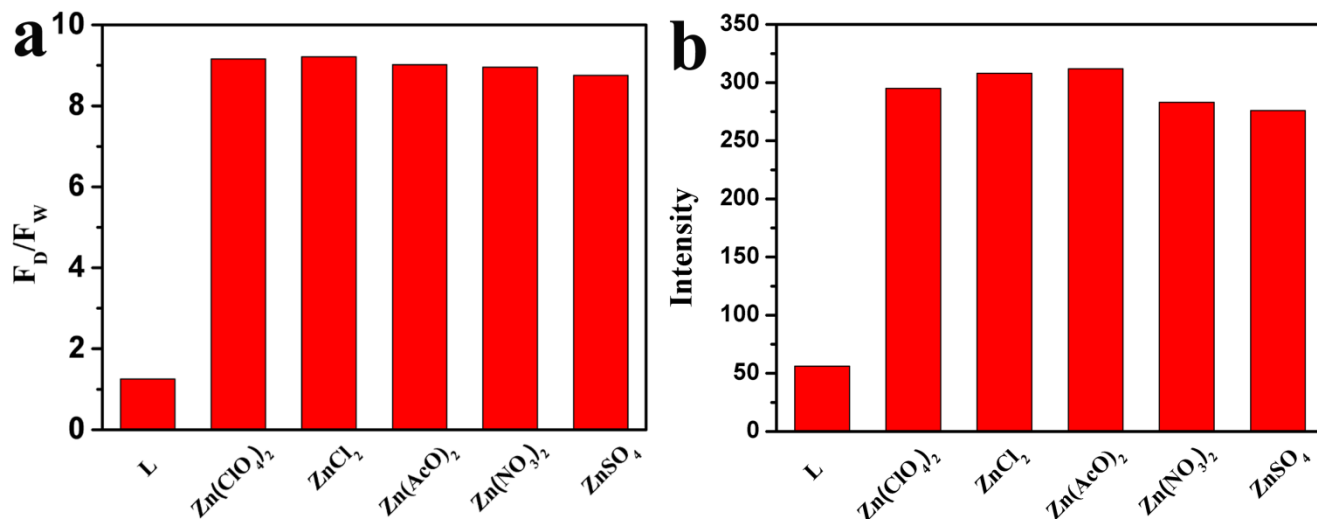

**Fig. S5** Counter anions test of  $\text{Zn}^{2+}$  with  $\text{Zn}(\text{ClO}_4)_2$ ,  $\text{ZnCl}_2$ ,  $\text{Zn}(\text{AcO})_2$ ,  $\text{Zn}(\text{NO}_3)_2$ , and  $\text{ZnSO}_4$  in 10 mM HEPES buffer solution at pH 7.4. (a) Excitation wavelength: 290 nm, (b) Excitation wavelength: 330 nm. In the inset of (a),  $F_D$  and  $F_W$  are the fluorescence emission intensity of dansyl and Tryptophan motifs.

## The pH test for **L** with $\text{Zn}^{2+}$

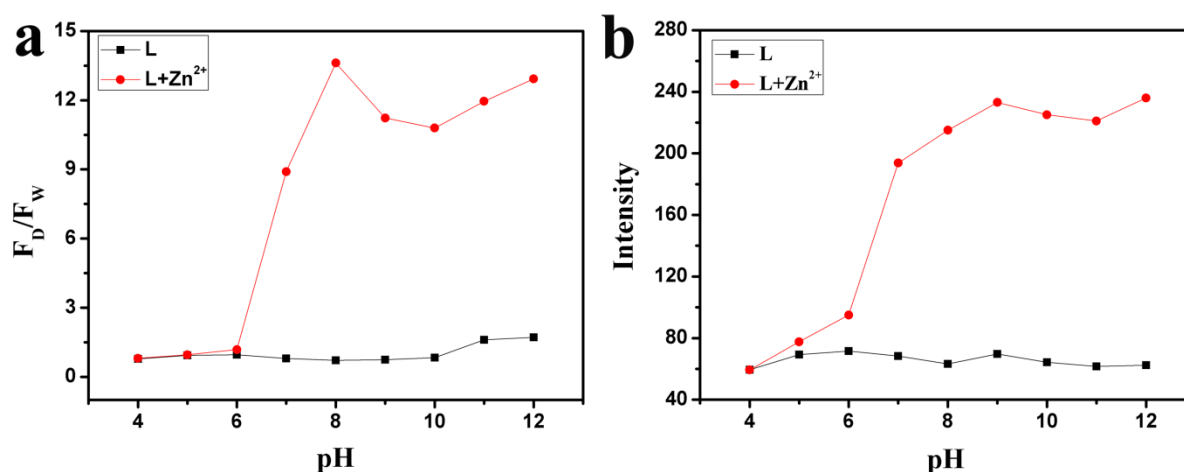

**Fig. S6** Influence of pH on the fluorescence intensity of **L** in the absence and presence of  $\text{Zn}^{2+}$  ions. (a) Excitation wavelength: 290 nm, (b) Excitation wavelength: 330 nm. In the inset of (a),  $F_D$  and  $F_W$  are the fluorescence emission intensity of dansyl and Tryptophan motifs.

## The binding constant of **L**-Zn

The association constant for 2:1 complex was calculated based on the titration curve of the probes with metal ions. Association constants was determined by a nonlinear least squares fitting of the data with the following equation according to the reference.<sup>[S1]</sup>

$$y = \frac{x}{2 \times a \times b \times (1 - x)^2} + \frac{x - b}{2}$$

Where  $x$  is  $I - I_0 / I_{\max} - I_0$ ,  $y$  is the concentration of metal ions,  $a$  is the association constant, and  $b$  is the concentration of probe. The binding constant of  $\text{Zn}^{2+}$  with **L** is  $2.8 \times 10^{11} \text{ M}^{-2}$ .

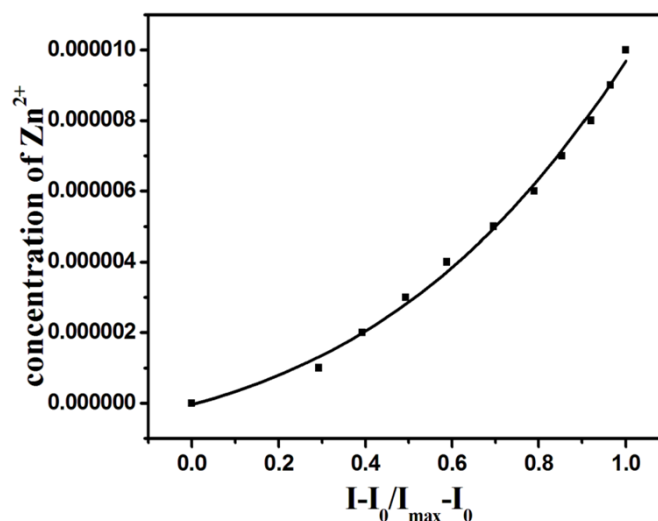

**Fig. S7** Fitting of fluorescence titration curve of **L** with  $\text{Zn}^{2+}$  in 10 mM HEPES buffer at pH 7.4. Excitation wavelength: 330 nm.

## The limit of detection for $\text{Zn}^{2+}$

The limit of detection (LOD) was calculated based on the fluorescence titration. The emission intensity of **L** without  $\text{Zn}^{2+}$  was measured 10 times and the standard deviation of blank measurements was determined. A good linear relationship between the fluorescence intensity at 545 nm and the  $\text{Zn}^{2+}$  concentration could be obtained in the 0–1.25  $\mu\text{M}$  concentration range ( $R = 0.9985$ ). The LOD was then calculated with the equation:  $\text{LOD} = 3\sigma/k$ , where  $\sigma$  is the standard deviation of blank measurements,  $k$  is the slope between intensity versus sample concentration.<sup>[S2]</sup> The LOD of **L** for  $\text{Zn}^{2+}$  was measured to be 97 nM.

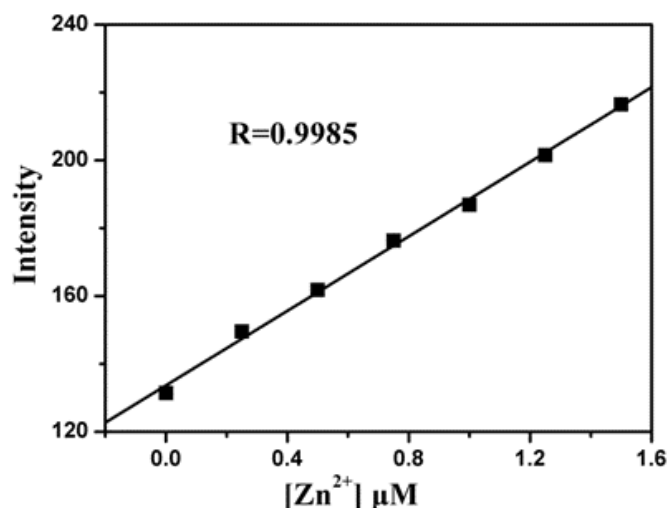

**Fig. S8** Fluorescence intensity at 545 nm for **L** (20  $\mu\text{M}$ ) as a function of the concentration of  $\text{Zn}^{2+}$  in 10 mM HEPES buffer at pH 7.4. Excitation wavelength: 330 nm.

## The mass spectrum analysis of L-Zn

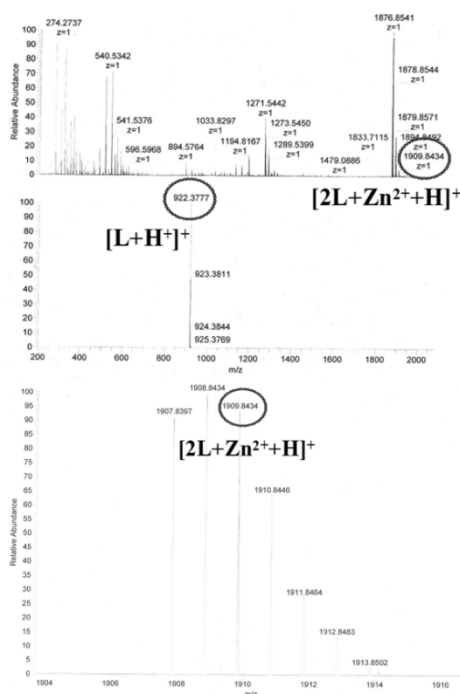

**Fig. S9** ESI mass spectrum of **L** (500  $\mu\text{M}$ ) in  $\text{H}_2\text{O}/\text{CH}_3\text{CN}$  (50/50, V/V) including  $\text{Zn}(\text{ClO}_4)_2$  (1 equiv).

The  $^1\text{H}$  NMR spectra analysis of L-Zn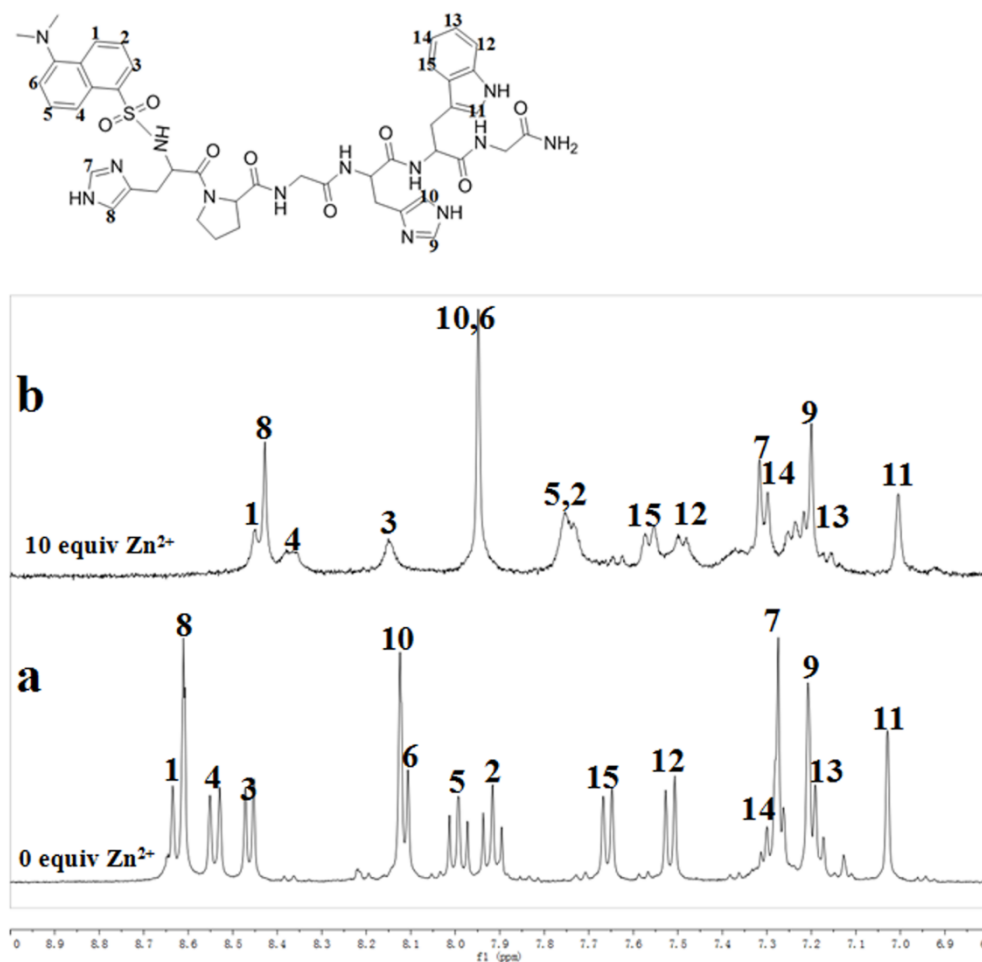

**Fig. S10** Partial  $^1\text{H}$  NMR spectra of **L** in the absence (a) and presence (b) of  $\text{Zn}(\text{ClO}_4)_2$  (10 equiv) in  $\text{D}_2\text{O}/\text{CD}_3\text{CN}$  (80: 20, v/v).

## References

- [S1] L. N. Neupane, J. Y. Park, J. H. Park and K. H. Lee, *Org. Lett.*, 2013, **15**, 254-257.  
[S2] L. Wang, W. Qin, X. Tang, W. Dou, W. Liu, Q. Teng, X. Yao, *Org. Bio. Chem.*, 2010, **8**, 3751-3757.
